# Supplementary material for: Highly enantioselective catalytic synthesis of chiral pyridines
Source: PubMed Central journal article supplement (PMC5727103; doi:10.1038/s41467-017-01966-7), 2017-12-12
Supplement: 41467_2017_1966_MOESM2_ESM.pdf [file 41467_2017_1966_MOESM2_ESM.pdf]

## Description of Additional Supplementary Files

File Name: Supplementary Data 1

Description: Crystallographic information file for X-ray
